1 **Self-produced hydrogen sulfide improves ethanol fermentation by**  
2 ***Saccharomyces cerevisiae* and other yeast species**

3 Emilio Espinoza-Simón <sup>1#</sup>, Paola Moreno-Alvarez <sup>1#</sup>, Elias Nieto-Zaragoza <sup>1</sup>,  
4 Carolina Ricardez-García <sup>2</sup>, Emmanuel Ríos-Castro <sup>3</sup>, Salvador Uribe-Carvajal <sup>2</sup>  
5 and Francisco Torres-Quiroz <sup>1,\*</sup>

6 <sup>1</sup> División de Ciencia Básica, Departamento de Bioquímica y Biología  
7 Estructural, Instituto de Fisiología Celular, Universidad Nacional Autónoma de  
8 México (UNAM), Ciudad de México, México

9 <sup>2</sup> División de Ciencia Básica, Departamento de Genética Molecular, Instituto  
10 de Fisiología Celular, Universidad Nacional Autónoma de México (UNAM),  
11 Ciudad de México, México

12 <sup>3</sup> Unidad de Genómica, Proteómica y Metabolómica, LaNSE, Centro de  
13 Investigación y de Estudios Avanzados del I.P.N., Ciudad de México, México

14 **#** These authors contributed equally to this work

15 **\*** Correspondence: [ftq@ifc.unam.mx](mailto:ftq@ifc.unam.mx)

16

17 **Abstract**

18 Hydrogen sulfide (H<sub>2</sub>S) is a gas produced endogenously in organisms from the  
19 three domains of life. In mammals, it is involved in diverse physiological  
20 processes, including the regulation of blood pressure, and its effects on memory.  
21 In contrast, in unicellular organisms the physiological role of H<sub>2</sub>S has not been  
22 studied in detail. In yeast, for example, in the winemaking industry H<sub>2</sub>S is an  
23 undesirable byproduct because of its rotten egg smell; however, its biological

24 relevance during fermentation is not well understood. The effect of H<sub>2</sub>S in cells is  
25 linked to a posttranslational modification in cysteine residues known as S-  
26 persulfidation. We evaluated S-persulfidation in the *Saccharomyces cerevisiae*  
27 proteome. We screened S-persulfidated proteins from cells growing in  
28 fermentable carbon sources and we identified several glycolytic enzymes as S-  
29 persulfidation targets. Pyruvate kinase, catalyzing the last irreversible step of  
30 glycolysis, increased its activity in the presence of a H<sub>2</sub>S donor. Yeast cells  
31 treated with H<sub>2</sub>S increased ethanol production; moreover, mutant cells that  
32 endogenously accumulated H<sub>2</sub>S produced more ethanol and ATP during the  
33 exponential growth phase. This mechanism of the regulation of the metabolism  
34 seems to be evolutionarily conserved in other yeast species, because H<sub>2</sub>S  
35 induces ethanol production in the pre-Whole Genome Duplication species  
36 *Kluyveromyces marxianus* and *Meyerozyma guilliermondii*. Our results suggest  
37 a new role of H<sub>2</sub>S in the regulation of the metabolism during fermentation.

38

39 **Keywords:** H<sub>2</sub>S; S-persulfidation; fermentation; yeast; metabolism;  
40 posttranslational modification; hydrogen sulfide.

41

## 42 **Introduction**

43 Hydrogen sulfide (H<sub>2</sub>S) is a gasotransmitter produced endogenously in cells. It  
44 has been associated with diverse physiological processes such as vasodilation  
45 [1], pain [2] and longevity in animals [3], plant growth and development [4],  
46 bacterial antibiotic resistance [5], and as a byproduct of alcoholic fermentation in  
47 yeast [6]. Surprisingly, the biological function of H<sub>2</sub>S in yeast is not fully  
48 understood [7]; the majority of reports describe how it is produced or how to  
49 prevent its production during fermentation [8–10]. In yeast, H<sub>2</sub>S is involved in  
50 heavy metal detoxification [11], population synchrony [12], and chronological

51 aging [3]; however the molecular mechanisms behind these phenomena have not  
52 been fully elucidated.

53 In yeast, the main metabolic pathway that produces H<sub>2</sub>S is the sulfate assimilation  
54 pathway [13], where inorganic sulfate is transformed to H<sub>2</sub>S and used in the  
55 synthesis of methionine and cysteine. This pathway is highly active in the  
56 exponential growth phase, as the principal H<sub>2</sub>S producer, sulfite reductase  
57 (encoded by *MET5* and *MET10*) [6], is highly active. The synthesis of H<sub>2</sub>S takes  
58 place in the first hours of fermentation and decreases at the final stages when  
59 cells reach the stationary phase [14]. The sulfur transferase Tum1p is another  
60 protein involved in H<sub>2</sub>S production during fermentation when high concentrations  
61 of cysteine are present in the media [15]. H<sub>2</sub>S is metabolized by Met17p a  
62 sulfhydrylase that catalyze the incorporation of sulfide for the biosynthesis of  
63 sulfur-containing amino acids [16].

64 The molecular effect of hydrogen sulfide depends on a posttranslational  
65 modification named S-persulfidation (originally termed sulfhydration) [17]. S-  
66 persulfidation involves addition of a thiol group to the cysteine residues (-S-SH)  
67 in proteins. This posttranslational modification has been associated with the  
68 activation and inhibition of protein activity [17,18].

69 In this work, for the first time, we evaluated the S-persulfidation of yeast proteins.  
70 We report that hydrogen sulfide is a regulator of glycolysis that increases ethanol  
71 production in *S. cerevisiae*. This was observed using an exogenous donor of  
72 hydrogen sulfide or mutant strains that accumulate or produce less H<sub>2</sub>S. This  
73 mechanism of regulation was conserved in pre-Whole Genome Duplication  
74 (WGD) species, such as the thermotolerant *Kluyveromyces marxianus* from the  
75 KLE clade and the oleaginous yeast *Meyerozyma guilliermondii* from the CUG-  
76 Ser1 clade. This work provides an insight into how H<sub>2</sub>S regulates glucose  
77 metabolism through an evolutionarily conserved mechanism, constituting an  
78 important role of H<sub>2</sub>S in fermentation.

79

## 80 **Materials and Methods**

### 81 *Yeast strains, media, and growth conditions*

82 *Saccharomyces cerevisiae* strains used in this study were S288C-derived  
83 laboratory strains BY4742 (*MAT $\alpha$  his3 $\Delta$ 1 leu2 $\Delta$ 0 lys2 $\Delta$ 0 ura3 $\Delta$ 0*) referred as *wt*,  
84 BY4741 (*MAT $\alpha$  his3 $\Delta$ 1 leu2 $\Delta$ 0 met17 $\Delta$ 0 ura3 $\Delta$ 0*). *Kluyveromyces marxianus* and  
85 *Meyerozyma guilliermondii* were isolated from mezcal producers in Michoacán,  
86 México [19]. Deletion strains derived from BY4742 were constructed by PCR-  
87 based gene replacement [20] using synthetic oligonucleotides and the kanMx and  
88 natMx disruption modules contained in plasmids pUG6 and pAG25. Gene  
89 deletions were confirmed by PCR using A and D oligos. Strains and  
90 oligonucleotides are listed in supplementary table 1. Strains were cultured at  
91 30°C in liquid YPD medium (1% yeast extract, 2% dextrose, 2% peptone) or YPG  
92 medium (1% yeast extract, 2% galactose, 2% peptone) until reaching the  
93 exponential growth phase (optical density at 660nm [OD<sub>660</sub>] =0.5-0.6) and cells  
94 were collected then for protein extraction.

95

### 96 *Reagents*

97 Sodium hydrosulfide (NaHS), Methyl methanethiosulfonate (MMTS), dithiothreitol  
98 (DTT), antibiotin antibody, neocuproine, deferoxamine and others chemicals  
99 were purchased from Sigma-Aldrich, St Louis MO, rabbit polyclonal anti-GAPDH  
100 (GTX100118, Genetex) were purchased from Genetex, Irvine, CA and N-(6-  
101 (biotinamido)hexyl)-3'-(2'-pyridyldithio)-propionamide (HPDP-biotin) (sc-  
102 207359), mouse monoclonal anti-enolase (sc-21738), goat polyclonal anti-CBS  
103 (sc-46830) and rabbit polyclonal anti-TIM (FL-249) were purchased from Santa  
104 Cruz Biotech, Dallas Tx.

105

106 *Modified biotin switch assay*

107 The modified biotin switch assay was performed as described previously [17,21].  
108 Briefly, after yeast cultures reached exponential phase, cells were collected, and  
109 intracellular proteins were extracted with chilled glass-beads in HEN buffer (250  
110 mM HEPES-NaOH pH 7.7, 1 mM EDTA) supplemented with 1% triton X-100, 0.1  
111 mM neocuproine, 0.1 mM deferoxamine and 1X protease cocktail inhibitor  
112 (Roche, Switzerland). Cell lysates were centrifuged at 16900 x g for 1 hr at 4°C,  
113 total extracts (1-2 mg) were blocked in HEN buffer with 2.5% SDS and 20 mM  
114 MMTS at 50°C for 20 min. The MMTS was removed by acetone precipitation and  
115 the protein pellet was resuspended in HEN buffer with 1% SDS. Protein labeling  
116 was performed with 0.8 mM HPDP-biotin for 3 h at room temperature in the dark.  
117 The biotinylated proteins were separated by SDS-polyacrylamide gel  
118 electrophoresis (PAGE) and subjected to immunoblot analysis.

119

120 *Purification of biotinylated proteins*

121 After biotin switch assay, labeled extracts were subjected to streptavidin-based  
122 affinity precipitation with magnetic beads. Labeled extracts were incubated with  
123 3X volumes of neutralization buffer (20 mM HEPES-NaOH pH 7.7, 100 mM NaCl,  
124 1 mM EDTA, 0.5% triton) and 25 µl of streptavidin magnetic beads (Pierce) with  
125 agitation, overnight at 4°C. Magnetic beads were collected and washed with wash  
126 buffer as indicated by manufacturer's instructions, biotinylated proteins were  
127 eluted with IP-MS elution buffer and analyzed using LS-MS or SDS-PAGE.

128

129 *Immunoblot analysis*

130 Protein extracts were separated by SDS-PAGE and transferred to polyvinylidene  
131 difluoride (PVDF) membranes (Millipore-Merck, Germany). Membranes were

132 blocked with 5% non-fat milk and incubated with a specific anti-biotin antibody  
133 overnight at 4°C. Proteins were detected with chemiluminescence using horse-  
134 radish peroxidase conjugated secondary antibodies (Jackson ImmunoResearch,  
135 West Grove, PA). Before to immunoblot, membranes were stained using  
136 Ponceau red (Millipore-Merck, Germany) as protein loading control.

137

### 138 *Quantification of intracellular ATP concentration*

139 NaHS was added to cells cultures at specific timepoints, then cells were  
140 centrifuged, and intracellular ATP was measured using the ATP Bioluminescent  
141 Assay Kit HS II (Roche, Switzerland). Cell samples were prepared by diluting  
142 treated cells to a final concentration of  $3.7 \times 10^9$  cells·mL<sup>-1</sup> in 500 µl with a buffer  
143 containing 100 mM Tris-HCl pH 7.8 and 4 mM EDTA. After 2 min incubation,  
144 samples were immersed in boiling water for 2 minutes, and the resulting cell  
145 extracts were incubated for 5 minutes at 4°C, cell debris were removed by  
146 centrifugation at 16900 x g for 5 min and supernatants were used to measure the  
147 amount of intracellular ATP using an ATP calibration curve prepared each time,  
148 as indicated by the manufacturer. Bioluminescence was detected in a POLARstar  
149 Omega luminometer (BGM LABTECH, Offenburg, Germany). Three independent  
150 experiments with three replicas were performed, and values are represented as  
151 mean ± standard error.

152

### 153 *Detection of H<sub>2</sub>S production*

154 H<sub>2</sub>S production by yeast strains colonies was detected through the generation of  
155 a visible black precipitate indicating that the hydrogen sulfide gas has reacted  
156 with lead nitrate [22]. Yeast strains were diluted, and cell density normalized to  
157  $3 \times 10^7$  cells·mL<sup>-1</sup>. Cells were spotted in solid media (3.2% dextrose, 0.4% yeast  
158 extract, 0.24% peptone, 0.016% ammonium sulfate, 0.08% lead nitrate, 1.6%

159 agar) and plates were kept at 30°C for 5-7 days. Also, H<sub>2</sub>S production was  
160 measured as reported previously [23] with some modifications. BY4742 *wt* strain  
161 were precultured at 30°C with constant shaking for 2 days in fresh YPD media.  
162 The assay was performed on a 96 well plate (COSTAR). Each well had 185 µL  
163 of YPD media, 5 µL of methylene blue (1 mg·mL<sup>-1</sup>) diluted in citrate buffer (100  
164 mM, pH 4.5) and 10 µL of cells, for a final OD<sub>600</sub> of 0.2. Growth was measured in  
165 an Infinite 200 (TECAN, Life Sciences) at 600 nm and 663 nm during 15 hours  
166 with intervals of 15 minutes between readings. During measures cells were  
167 incubated at 30°C with occasionally shaking. Three experimental replicates were  
168 made, with six different biological replicates in each experiment. Data for the  
169 hydrogen sulfide production were analyzed with the following formula:

$$170 \quad \frac{((OD_{600nm\ t0} - OD_{663nm\ t0}) - (OD_{600nm\ tx} - OD_{663nm\ tx}))}{OD_{600nm\ tx\ from\ no\ reaction\ mix}}$$

171

## 172 *Fermentation assays*

173 BY4742 *wt* and derived mutants were precultured in liquid YPD medium for 24 h  
174 at 30°C, under agitation at 90 rpm in an Excella E24 incubator Shaker (New  
175 Brunswick Scientific, USA), then were inoculated in a 2L flask containing 500 mL  
176 of fresh YPD with an initial OD<sub>600</sub>=0.2 and incubated in the same conditions.  
177 When cells reached DO<sub>660</sub>=0.5, a pulse of NaHS was added. After 7h of NaHS  
178 addition, aliquots of 2 ml were obtained, DO<sub>660</sub> was measured, and cells  
179 centrifuged at 16900 x g for 1 min. Supernatants were stored at -20°C for  
180 subsequent ethanol quantification. For mutant and *wt* strains, aliquots were taken  
181 every hour after cells were inoculated, supernatants were stored at -20°C.  
182 Ethanol production was evaluated through enzymatic assay coupled to NAD<sup>+</sup>  
183 reduction. Briefly, supernatants were incubated in buffer (114 mM K<sub>2</sub>HPO<sub>4</sub> pH  
184 7.6), 1.8 mM NAD<sup>+</sup> and 39µg·mL<sup>-1</sup> alcohol dehydrogenase (ADH) for 30 min at  
185 30°C with vigorous agitation [24]. Produced NADH was monitored by the increase  
186 in absorbance at 340 nm. The results are reported as mM ethanol per 1x10<sup>7</sup> cells.



187 Three independent experiments with three replicas were performed, and values  
188 are represented as mean  $\pm$  standard error. *K. marxianus* fermentation assay was  
189 performed as in *S. cerevisiae* strains, when cells reached  $DO_{660}=0.5$ , a pulse of  
190 NaHS 0.1mM was added. After 7h of NaHS addition, aliquots of 2 ml were  
191 obtained, and ethanol was quantified. For *Meyerozyma guilliermondii* when cells  
192 reached  $DO_{660}=0.5$ , a pulse of NaHS 0.1mM was added, 24h later another pulse  
193 of same concentration was added and 7h later ethanol was quantified.

194

#### 195 *Enzymes activity assays*

196 Glyceraldehyde 3 phosphate dehydrogenase (GAPDH) [17], pyruvate kinase  
197 (PK) [25] and alcohol dehydrogenase (ADH) [26] activities were measured by  
198 specific reaction assays and monitored spectrophotometrically at 340 nm,  
199 recording the rate of NAD to NADH reduction. Cells cultures were exposed to  
200 NaHS at different times, protein extracts were quantified, and 10  $\mu$ g of protein  
201 were incubated in assay buffer as follows: for GAPDH (20 mM Tris-HCl pH 7.8,  
202 100 mM NaCl, 0.1  $\text{mg}\cdot\text{mL}^{-1}$  Bovine serum albumin, 2 mM  $\text{NAD}^+$ , 10 mM sodium  
203 pyrophosphate, 20 mM sodium arsenate, 500 mM DTT buffer, phosphate  
204 buffered saline (PBS) 1X, 27.3 mM glyceraldehyde 3-phosphate [G3P]). For PK  
205 (50 mM Imidazole-HCl, 120 mM KCl, 62 mM  $\text{MgSO}_4$  pH 7.6, 45 mM ADP, 6.6  
206 mM NADH, 45 mM phosphoenolpyruvate [PEP], 1.3  $\text{KU}\cdot\text{mL}^{-1}$  lactate  
207 dehydrogenase). For ADH (114 mM  $\text{K}_2\text{HPO}_4$  pH 7.6), 1.8 mM  $\text{NAD}^+$ , and 16.4  
208 mM ethanol). Three independent experiments with three replicas were  
209 performed, and values are represented as mean  $\pm$  standard error.

210

#### 211 *Oxygen consumption rate assay*

212 BY4742 *wt* and derived mutant cells were precultured in liquid YPD medium for  
213 48 hrs at 30°C, then were cultured in YPD medium with an initial  $DO_{600}=0.2$  under



214 agitation in an Excella E24 incubator (New Brunswick Scientific, USA) for 7h at  
215 30°C. Basal oxygen consumption was measured in resting cells with a Clark  
216 electrode (Oximeter model 782, Warner/Strathkelvin Instruments, North  
217 Lanarkshire, Scotland) in a water-jacketed chamber. Temperature was kept at 30  
218 °C using a water bath (PolyScience 7 L, IL). Oxygen consumption reaction  
219 mixture was MES 10 mM pH 6 and 500 mg (wet weight) of cells were added at  
220 chamber [24]. To evaluate role of NaHS addition, when BY4742 cells reached  
221  $OD_{600}=0.5$ , a pulse of 0.1 mM NaHS was added. Seven hours later, basal oxygen  
222 consumption was measured as abovementioned. Results are reported as  
223  $\text{ngO/wet weight g/ mn}$  and values are represented as mean  $\pm$  standard error.  
224  $\text{et weight}$ ) of cells were added at chamber.

225

#### 226 *Sample preparation and LC-MALDI-MS/MS*

227 Biotinylated proteins were digested with 250 ng of trypsin mass spectrometry  
228 grade (Sigma-Aldrich, St. Louis, MO) in 50 mM of ammonium bicarbonate (ABC).  
229 Resulting tryptic peptides were desalted using ZipTip C18 (Millipore) and  
230 concentrated to an approximated volume of 10  $\mu\text{L}$ . Afterward, 9  $\mu\text{L}$  were loaded  
231 into ChromXP Trap Column C18-CL precolumn (Eksigent, Redwood City CA);  
232 350  $\mu\text{m}$  X 0.5 mm, 120  $\text{\AA}$  pore size, 3  $\mu\text{m}$  particle size and desalted with 0.1%  
233 trifluoroacetic acid (TFA) in  $\text{H}_2\text{O}$  at a flow of 5  $\mu\text{L min}^{-1}$  for 10 min. Then, peptides  
234 were loaded and separated on a 3C18-CL-120 column (Eksigent, Redwood City  
235 CA); 75  $\mu\text{m}$  X 150 mm, 120  $\text{\AA}$  pore size, 3  $\mu\text{m}$  particle size, in a HPLC Ekspert  
236 nanoLC 425 (Eksigent, Redwood City CA) using as a mobile phase A, 0.1% TFA  
237 in  $\text{H}_2\text{O}$  and mobile phase B 0.1% TFA in acetonitrile (ACN) under the following  
238 lineal gradient: 0-3 min 10% B, 60 min 60% B, 61-64 min 90 % B, 65 to 90 min  
239 10% B at a flow of 250  $\text{nL min}^{-1}$ . Eluted fractions were automatically mixed with a  
240 solution of 2  $\text{mg}\cdot\text{mL}^{-1}$  of alfa-cyano-4-hydroxycinnamic acid (CHCA) in 0.1% TFA  
241 and 50% ACN as a matrix, spotted in an Opti-TOF plate of 384 spots using a  
242 MALDI Ekspot (Eksigent, Redwood City CA) with a spotting velocity of 20 s per  
243 spot at a matrix flow of 1.6  $\mu\text{L min}^{-1}$ . The generated spots were analyzed by a

244 MALDI-TOF/TOF 4800 Plus mass spectrometer (ABSciex, Framingham MA).  
245 Each MS Spectrum was acquired by an accumulation of 1000 shots in a mass  
246 range of 850-4000 Th with a laser intensity of 3800. The 100 more intense ions  
247 with a minimum signal-noise (S/N) of 20 were programmed to fragmenting. The  
248 MS/MS spectra were obtained by fragmentation of selected precursor ions using  
249 Collision-Induced Dissociation (CID) and acquired by 3000 shots with a laser  
250 intensity of 4300. Generated MS/MS spectrums were compared using Protein  
251 Pilot software v. 2.0.1 (ABSciex, Framingham MA) against *Saccharomyces*  
252 *cerevisiae*, strain ATCC 204508/S288c database (downloaded from Uniprot,  
253 6049 protein sequences) using Paragon algorithm. Search parameters were: Not  
254 constant modifications in cysteines, trypsin as a cutter enzyme, all the biological  
255 modifications and amino acids substitution set by the algorithm (including  
256 carbamidomethylated cysteine as a variable modification); as well as  
257 phosphorylation emphasis and Gel-based ID as special factors. The detection  
258 threshold was considered in 1.3 to acquire 95% of confidence; additionally, the  
259 identified proteins showed a local FDR of 5% or less. Since a peptide derived  
260 from a given fragmentation spectra may be shared among redundant proteins  
261 during database search, it is necessary group all competing proteins and report  
262 only the protein with more spectrometric evidence; for this reason, identified  
263 proteins were grouped by ProGroup algorithm contained in the software Protein  
264 Pilot to minimize redundancy.

265

## 266 **Results**

### 267 *S-Persulfidation of yeast proteins growing on a fermentable carbon source*

268 Protein S-persulfidation was detected using the modified biotin switch method  
269 [17]. In order to validate the method in yeast, we performed the assay in either a  
270 poor producer (*met5 $\Delta$ met10 $\Delta$* ) or an accumulator (*met17 $\Delta$* ) strain of H<sub>2</sub>S and  
271 compared them to the *wt* (BY4742) (Figure 1A). Cells were grown using glucose  
272 as the carbon source, and at the exponential phase, when H<sub>2</sub>S is produced [6],

273 the protein was extracted. S-Persulfidated proteins were accumulated in *met17Δ*  
274 in comparison to the *met5Δmet10Δ* strain and wt as expected (Figure 1B).

275 In yeast, H<sub>2</sub>S is produced during fermentation, however, the S-persulfidation  
276 target proteins are not known. We used mass spectrometry to analyze the S-  
277 persulfidated proteins in cells growing at the exponential phase in two different  
278 fermentable carbon sources: glucose and galactose. Glucose is the preferred  
279 fermentable carbon source of yeast, while galactose needs to be isomerized to  
280 enter the glycolytic pathway. We found 42 S-persulfidated proteins; 21 were  
281 specific to glucose-grown cells, 4 were specific to galactose-grown cells, and 17  
282 proteins were found in both conditions (Supplementary Table 2). Among the  
283 generally expressed 17 proteins, 15 were reported before as proteins with a  
284 redox-regulated cysteine [27], which is a feature of cysteines susceptible to  
285 posttrans-lational modifications [28]. Cytoplasmic translation (seven proteins)  
286 and glycolysis (seven proteins) were the most represented biological processes  
287 in the cells growing in either condition. Interestingly, pyruvate decarboxylase 1  
288 (Pdc1), a key enzyme in alcoholic fermentation, and Adh1, the major enzyme  
289 responsible for ethanol synthesis, were also found, suggesting a possible role of  
290 S-persulfidation in fermentation. The identities of some glycolytic enzymes,  
291 glyceraldehyde 3-phosphate dehydrogenase (GAPDH), eno-lase, and  
292 triosephosphate isomerase (Tdh3, Eno2, and Tpi1, respectively) were confirmed  
293 using specific antibodies (Figure 2). We also tested cystathionine beta-synthase  
294 (Cys4), which was described before as a possible S-persulfidated protein [17,  
295 29], although it must be considered that in our mass spectrometry analysis it did  
296 not pass the threshold (unused score of 1.04, coverage of 43.98%), we did find  
297 that Cys4 was a target of S-persulfidation.

298

### 299 *H<sub>2</sub>S production during yeast growth*

300 In order to evaluate H<sub>2</sub>S production during yeast growth, we determined H<sub>2</sub>S in  
301 the wt. The H<sub>2</sub>S reached a maximal amount during the log phase and dropped its

302 production (Figure 3). Suggesting that the H<sub>2</sub>S concentration is not constant and  
303 drops when the culture stops growing.

304

### 305 *H<sub>2</sub>S increases glycolytic enzymes activities*

306 Among the first effects of S-persulfidation described was the increase in GAPDH  
307 activity [17]. Considering that Tdh3 (GAPDH) was one of the glycolytic enzymes  
308 targeted for S-persulfidation, we decided to test the effect of NaHS (a donor of  
309 H<sub>2</sub>S) on GAPDH activity. Cells were stimulated with 0.1 mM or 0.25 mM NaHS  
310 for two and seven hours. Then, the protein was extracted, and the GAPDH activity  
311 was measured. We found that after two hours of NaHS stimulation, both at 0.1  
312 mM and at 0.25 mM, increased GAPDH activity 1.4 times (Figure 4A), and the  
313 effect was lost at seven hours (Figure 4B). Another protein identified by mass  
314 spectrometry was pyruvate kinase (PK) that catalyzes the last irreversible step of  
315 glycolysis. We measured the activity of the pyruvate kinase at two hours of  
316 treatment with 0.1 mM or 0.25 mM NaHS finding that NaHS increased PK activity  
317 2.39 times (Figure 4C, Supplementary Table 3), and lost its effect at seven hours  
318 (Figure 4D). Finally, we subjected alcohol dehydrogenase (ADH) to the same  
319 treatment, and we did not find any significant difference between the treated and  
320 untreated cells, i.e., at these concentrations NaHS did not affect ADH activity  
321 (Supplemental Figure 1).

322

### 323 *H<sub>2</sub>S stimulates fermentation*

324 The glycolytic enzymes GAPDH and PK increased their activity in response to  
325 H<sub>2</sub>S. In addition, mass spectrometry data indicated that these and other enzymes  
326 from gly-colysis were S-persulfidated. Thus, we decided to test whether H<sub>2</sub>S  
327 influenced the syn-thesis of ethanol. Exponential-phase-grown cells were treated  
328 with 0.1 mM NaHS and after seven hours, the supernatant was collected. It was

329 observed that the treated cells had increased ethanol production as compared to  
330 the control (Figure 5A).

331 In order to test the effect of endogenous H<sub>2</sub>S in fermentation, we decided to  
332 compare ethanol production in the two isogenic lab strains BY4741 and BY4742.  
333 The only difference between these two strains is that BY4741 has a deletion of  
334 *MET17* and strain BY4742 has a deletion of *LYS2*. As mentioned before, the  
335 *met17*Δ strain endogenously accumulates H<sub>2</sub>S, because *MET17* codifies for the  
336 enzyme using H<sub>2</sub>S and O-acetyl homoserine to synthesize homocysteine. An  
337 overnight preculture of each strain was diluted to an OD<sub>600</sub>=0.2, the  
338 supernatants were collected after 24 h, and the ethanol was quantified. The strain  
339 accumulating H<sub>2</sub>S endogenously, BY4741 *met17*Δ, produced more ethanol than  
340 the strain BY4742 *MET17* (Figure 5B).

341 Ethanol is the main product of fermentation. Additionally, during glycolytic  
342 fermentation two ATP molecules are synthesized. Thus, we decided to quantify  
343 the ATP after treatment with NaHS. Exponential-phase cells were treated with  
344 the same quantities of NaHS used before, and the ATP was quantified two and  
345 four hours after treatment. After two hours, the treated cells produced more ATP  
346 than the untreated cells; this effect was lost four hours after treatment (Figure  
347 5C). These results suggest that H<sub>2</sub>S stimulates glycolysis, and that fermentation  
348 is enhanced to produce both ATP and ethanol.

349 Based on these results we decided to compare whether the endogenous H<sub>2</sub>S had  
350 an influence on the onset of ethanol synthesis. We measured the ethanol  
351 production of the poor H<sub>2</sub>S producer strain *met5*Δ*met10*Δ, the H<sub>2</sub>S accumulator  
352 *met17*Δ strain, and the wt. The cells from 48 hours preculture were resuspended  
353 in fresh media and aliquots from the supernatant were collected every hour. The  
354 *met17*Δ strain initiated ethanol production at five hours, the wt strain initiated  
355 production at six hours, and the *met5*Δ*met10*Δ initiated production after seven  
356 hours (Figure 6A). This result showed that the cells with high endogenously  
357 accumulated H<sub>2</sub>S began ethanol production before the cells with a lower H<sub>2</sub>S  
358 concentration.

359 Finally, in each of these strains we quantified the ATP at the exponential or  
360 stationary phase. We found that the endogenously H<sub>2</sub>S accumulator strain  
361 produced the most ATP during the exponential phase, while there were no  
362 differences in the ATP concentration at the stationary phase between the wt and  
363 mutant strains (Figure 6B). These results support our proposal that H<sub>2</sub>S  
364 stimulates ethanol and ATP production.

365

### 366 *Endogenous H<sub>2</sub>S accumulation promotes basal oxygen consumption*

367 ATP could be synthesized as product of the glycolysis and the oxidative phos-  
368 phorylation. In order to elucidate if the ATP produced by H<sub>2</sub>S stimulation was from  
369 oxidative phosphorylation, we measured oxygen consumption from wt strain and  
370 mu-tants. A 48 hours preculture of each strain was diluted to an OD<sub>600</sub>= 0.2, and  
371 oxygen consumption was measured. Then, after seven hours (when cells were  
372 at exponential phase) oxygen was measured again (Figure 7). We found, in the  
373 diluted cells, that the *met5Δmet10Δ*, and the *met17Δ* consumed more oxygen  
374 than the *wt* strain. On the other hand, after seven hours of growing, we found that  
375 the *met17Δ* strain maintained the elevated rate of oxygen consumption. This  
376 result suggest that endogenously accumulated H<sub>2</sub>S promotes oxygen  
377 consumption.

378

### 379 *H<sub>2</sub>S stimulates ethanol production in *Meyerozyma guilliermondii* and* 380 *Kluyveromyces marxianus*

381 Ethanol synthesis is more robust in Crabtree positive yeast species; this  
382 phenomenon is associated with the WGD [30]. Evidence suggests that the WGD  
383 event arose from an interspecies hybridization between a strain from the KLE  
384 clade (genera *Kluyveromyces*, *Lachancea* and *Eremothecium*) and a strain from  
385 the ZT clade (*Zygosaccharomyces* and *Torulaspota*) [31]. The CUG-Ser1 clade

386 first appeared approximately 117 million years before the WGD event; the CUG-  
387 Ser1 clade is characterized by a change in codon usage [32]. Considering this,  
388 we decided to test the effect of H<sub>2</sub>S during ethanol synthesis on the KLE clade  
389 strain, *K. marxianus* and in *M. guilliermondii* from the CUG-Ser1 clade. *K.*  
390 *marxianus* exponential-phase cells were stimulated with NaHS. Treatment with  
391 the H<sub>2</sub>S donor in *K. marxianus* increased ethanol synthesis as in *S. cerevisiae*  
392 (Figure 8a). In *M. guilliermondii*, it was noted that ethanol synthesis took longer  
393 than 24 h when glucose was the carbon source [33]; for this reason, the  
394 exponential-phase cells were treated with NaHS and treated again 24 h later. As  
395 observed in *K. marxianus*, ethanol synthesis increased after the H<sub>2</sub>S donor  
396 treatment on *M. guilliermondii* (Figure 8b) confirming that there is an effect of H<sub>2</sub>S  
397 on the fermentation activity of these two species of yeast.

398

## 399 Discussion

400 Hydrogen sulfide is produced endogenously in yeast, and it is considered a fer-  
401 mentation byproduct; however its biological role is unknown. The biological  
402 effects of H<sub>2</sub>S are linked to a cysteine posttranslational modification termed S-  
403 persulfidation [17]. In this work, we analyzed S-persulfidated proteins on the yeast  
404 proteome. We identified several glycolytic enzymes as S-persulfidation targets,  
405 as reported previously in tissues such as the brain, heart and liver [29], in  
406 hepatocytes [17], a pancreatic beta cell line [34], HEK293 cells [29], plant [35,36]  
407 and bacteria [37]. Interestingly, Fu and collaborators reported six S-persulfidated  
408 glycolytic enzymes (ALDOA, GAPDH, PGK1, ENO1, PKM and LDHA) when they  
409 evaluated S-persulfidated proteins in cells overexpressing the H<sub>2</sub>S-producer  
410 enzyme cystathionine gamma-lyase (CSE) [29]. In a previous report, in  
411 pancreatic beta cells, metabolites were measured, and H<sub>2</sub>S was associated with  
412 an increased glycolytic metabolic flux of cells under chronic stress. All these  
413 reports agreed that several glycolytic enzymes were S-persulfidated, even when  
414 the activity of GAPDH was the only one measured [17]. Cysteine's  
415 posttranslational modifications of glycolytic enzymes regulate the subcellular



416 localization and oligomerization, which can impact its activity [38–40]. In a cell  
417 culture, H<sub>2</sub>S production is not constant, it starts to decline when the cells are at  
418 the middle of the logarithmic phase, suggesting that H<sub>2</sub>S synthesis could be  
419 regulated by the metabolic conditions. In *S. cerevisiae*, we found that GAPDH  
420 increased its activity with the H<sub>2</sub>S donor NaHS two hours after the treatment, and  
421 the effect was lost at seven hours. It is important to note that H<sub>2</sub>S is released from  
422 NaHS just a few seconds after the sodium salt is dissolved [41]; hence, the effect  
423 of NaHS two hours after treatment may be attributed to a chemical modification  
424 of the enzymes, such as S-persulfidation. The thioredoxin system eliminates this  
425 posttranslational modification [42,43], which is consistent with the idea that  
426 cellular mechanisms maintain protein S-persulfidation homeostasis [44]. Seven  
427 hours after stimulation, there was no effect on GAPDH activity probably due to  
428 the loss of S-persulfidation by the protein. Furthermore, the cells were no longer  
429 at an exponential phase seven hours after the OD<sub>600</sub> reached 0.5, and the yeast  
430 metabolism changed to aerobic at the diauxic shift. The enzymes catalyzing the  
431 irreversible steps regulate the glycolytic pathway [45]; and we found that the  
432 enzyme involved in the last irreversible step, pyruvate kinase, increased its  
433 activity when stimulated with NaHS. The increase in pyruvate kinase activity may  
434 have at least two important consequences: feeding the Krebs cycle and/or  
435 stimulating the synthesis of ethanol. Considering that yeast synthesizes H<sub>2</sub>S  
436 during fermentation, we decided to test whether NaHS increased ethanol  
437 production. We found that cells treated with the H<sub>2</sub>S donor produced more  
438 ethanol. In order to confirm our observations, we measured the ethanol  
439 production in the isogenic strains BY4741 and BY4742. These strains have  
440 almost the same selection markers, and they differ only in one of them, BY4741  
441 accumulates H<sub>2</sub>S because it is *met17Δ*; BY4742 is *lys2Δ*, and thus, it does not  
442 accumulate H<sub>2</sub>S. We observed that BY4741 produced more ethanol than  
443 BY4742, suggesting that endogenous H<sub>2</sub>S levels increase ethanol synthesis.  
444 Previously, it was reported that BY4742 fermenting activity was slower than in  
445 BY4741; it would be interesting to analyze the role of H<sub>2</sub>S in this system [46].  
446 Considering these results, we proposed that if H<sub>2</sub>S stimulates fermentation, then  
447 mutants accumulating H<sub>2</sub>S would begin ethanol production before strains  
448 producing less H<sub>2</sub>S. We tested this hypothesis by comparing ethanol production  
449 between a lower producer of H<sub>2</sub>S, the strain *met5Δmet10Δ*, the accumulator

450 strain *met17* $\Delta$ , and the *wt*. We found that the *met17* $\Delta$  strain started to produce  
451 ethanol before the *wt* strain; in turn, the *met5* $\Delta*met10* $\Delta$  strain production of ethanol  
452 was delayed even longer. The results confirmed that endogenous concentra-  
453 tions of H<sub>2</sub>S affects ethanol synthesis. Finally, we measured ATP production in  
454 all strains, and we found that at the logarithmic phase the *met17* $\Delta$  strain produced  
455 more ATP than the others. This result supports the idea that in addition to  
456 increasing an early synthesis of ethanol, H<sub>2</sub>S and also enhances ATP production  
457 at the exponential phase of growth.$

458 The fermentation and the oxidative phosphorylation could yield ATP. We found  
459 that at exponential phase the *met17* $\Delta$  strain produced more ATP than the *wt* and  
460 *met5* $\Delta*met10* $\Delta$  strains. In order to test if the ATP was produced from the oxidative  
461 phosphorylation, we measured basal oxygen consumption on these strains. We  
462 found that the *met17* $\Delta$  strain has an elevated rate of oxygen consumption, and  
463 this is sustained when cells were at exponential phase of growth; suggesting that  
464 endogenously accumulated H<sub>2</sub>S induces oxygen consumption. This would be  
465 contradictory to a report where described that exogenous H<sub>2</sub>S inhibit respiration  
466 [47], however, at physiological concentrations H<sub>2</sub>S could induce the S-  
467 persulfidation of the ATP synthase from mammals and increases its activity [48].  
468 The S-persulfidation takes place at cysteines 244 and 294 of human ATP  
469 synthase. The yeast ATP synthase (Atp1) conserved the cysteine 244  
470 (Supplementary figure 2) in lineal sequence and has similar orientation on protein  
471 structure; therefore, the S-persulfidation could also be carried out in Atp1. Our  
472 results suggest that endogenous H<sub>2</sub>S has an effect on glycolysis and oxygen  
473 consumption. The effect of endogenous H<sub>2</sub>S on metabolism may explain the  
474 advantage of the *met17* $\Delta$  strain growing on fermentable carbon sources (glucose  
475 and galactose), over the *wt* and *met5* $\Delta*met10* $\Delta$  strains (Supplementary figure 3).$$

476 It is accepted that the origin of *S. cerevisiae* comes from a WGD event, probably  
477 by the interspecies hybridization between a strain from the KLE clade and a strain  
478 from the ZT clade [31]. WGD species have a more pronounced Crabtree effect  
479 than non-WGD species [30], so we decided to test whether H<sub>2</sub>S influenced yeast  
480 from the parental KLE clade that originated *S. cerevisiae* and a Crabtree-negative

481 species from the CUG-Ser1 clade. The origin of this clade is estimated to be  
482 between 178 and 248 million years ago (mya), and this event occurred before  
483 WGD, estimated to be between 82 and 105 mya [32]. We found that both species  
484 increase ethanol production after the NaHS treatment suggesting that i) H<sub>2</sub>S is a  
485 positive regulator of fermentation and ii) this effect is evolutionarily conserved.

486 Overall, H<sub>2</sub>S is considered as a fermentation byproduct on yeast even when its  
487 biological effect is unknown. Here, we proposed a very different picture that will  
488 change our vision of how H<sub>2</sub>S regulates cell metabolism.

489

## 490 **5. Conclusions**

491 In conclusion, our data demonstrated that H<sub>2</sub>S is a regulator of energetic  
492 metabolism. These results fill a major gap in the understanding of H<sub>2</sub>S and its  
493 control of ethanol production, which is evolutionarily conserved among yeast  
494 species. Finally, our work provides the foundation for a mechanistic  
495 understanding of the effects of H<sub>2</sub>S.

496 Supplementary Materials: Figure S1: Alcohol dehydrogenase activity; Figure S2:  
497 ATP synthase alignment; Figure S3: wt, met5Δmet10Δ, and met17Δ strains  
498 growth curves; Table S1: Strains and oligonucleotides primers; Table S2: Mass  
499 spectrometry results; Table S3: Protein activity data

500

## 501 **Funding**

502 This work was supported by the Programa de Apoyo a Proyectos de  
503 Investigación e Innovación Tecnológica from the Dirección General de Asuntos  
504 del Personal Académico of the Universidad Nacional Autónoma de México (FTQ:

505 UNAM-DGAPA-PAPIIT IA200315, IA202217 and IN209219; SUC: IN208821)  
506 and from the Consejo Nacional de Ciencia y Tecnología, Convocatoria de Ciencia  
507 Básica to FTQ (CONACyT-CB-238681).

## 508 **Acknowledgments**

509 Authors acknowledge Dr. Antonio Peña and Dr. Norma Silvia Sanchez for the  
510 *Kluyveromyces marxianus* and *Meyerozyma guilliermondii* strains provided, Dr.  
511 Natalia Chi-quete-Félix, Dr. Gabriel del Rio and Dr. Teresa Lara for technical  
512 assistance.

513

## 514 **References**

515 1. Yang, G.; Wu, L.; Jiang, B.; Yang, W.; Qi, J.; Cao, K.; Meng, Q.; Mustafa,  
516 A.K.; Mu, W.; Zhang, S.; et al. H<sub>2</sub>S as a Physiologic Vasorelaxant: Hypertension  
517 in Mice with Deletion of Cystathionine Gamma-Lyase. *Science* 2008, 322, 587–  
518 590, doi:10.1126/science.1162667.

519 2. Kawabata, A.; Ishiki, T.; Nagasawa, K.; Yoshida, S.; Maeda, Y.;  
520 Takahashi, T.; Sekiguchi, F.; Wada, T.; Ichida, S.; Nishikawa, H. Hydrogen  
521 Sulfide as a Novel Nociceptive Messenger. *Pain* 2007, 132, 74–81,  
522 doi:10.1016/j.pain.2007.01.026.

523 3. Hine, C.; Harputlugil, E.; Zhang, Y.; Ruckenstuhl, C.; Lee, B.C.; Brace, L.;  
524 Longchamp, A.; Treviño-Villarreal, J.H.; Mejia, P.; Ozaki, C.K.; et al. Endogenous  
525 Hydrogen Sulfide Production Is Essential for Dietary Restriction Benefits. *Cell*  
526 2015, 160, 132–144, doi:10.1016/j.cell.2014.11.048.

- 527 4. Dooley, F.D.; Nair, S.P.; Ward, P.D. Increased Growth and Germination  
528 Success in Plants Following Hydrogen Sulfide Administration. *PLoS One* 2013,  
529 8, e62048, doi:10.1371/journal.pone.0062048.
- 530 5. Shatalin, K.; Shatalina, E.; Mironov, A.; Nudler, E. H<sub>2</sub>S: A Universal  
531 Defense against Antibiotics in Bacteria. *Science* 2011, 334, 986–990,  
532 doi:10.1126/science.1209855.
- 533 6. Jiranek, V.; Langridge, P.; Henschke, P.A. Regulation of Hydrogen Sulfide  
534 Liberation in Wine-Producing *Saccharomyces Cerevisiae* Strains by Assimilable  
535 Nitrogen. *Appl Environ Microbiol* 1995, 61, 461–467, doi:10.1128/aem.61.2.461-  
536 467.1995.
- 537 7. Huang, C.-W.; Walker, M.E.; Fedrizzi, B.; Gardner, R.C.; Jiranek, V.  
538 Hydrogen Sulfide and Its Roles in *Saccharomyces Cerevisiae* in a Winemaking  
539 Context. *FEMS Yeast Res* 2017, 17, doi:10.1093/femsyr/fox058.
- 540 8. Huang, C.; Roncoroni, M.; Gardner, R.C. MET2 Affects Production of  
541 Hydrogen Sulfide during Wine Fermentation. *Appl Microbiol Biotechnol* 2014, 98,  
542 7125–7135, doi:10.1007/s00253-014-5789-1.
- 543 9. Boudreau, T.F.; Peck, G.M.; O’Keefe, S.F.; Stewart, A.C. The Interactive  
544 Effect of Fungicide Residues and Yeast Assimilable Nitrogen on Fermentation  
545 Kinetics and Hydrogen Sulfide Production during Cider Fermentation. *J Sci Food*  
546 *Agric* 2017, 97, 693–704, doi:10.1002/jsfa.8096.
- 547 10. Wang, C.; Liu, M.; Li, Y.; Zhang, Y.; Yao, M.; Qin, Y.; Liu, Y. Hydrogen  
548 Sulfide Synthesis in Native *Saccharomyces Cerevisiae* Strains during Alcoholic  
549 Fermentations. *Food Microbiol* 2018, 70, 206–213,  
550 doi:10.1016/j.fm.2017.10.006.

- 551 11. Sun, G.L.; Reynolds, Erin.E.; Belcher, A.M. Using Yeast to Sustainably  
552 Remediate and Extract Heavy Metals from Waste Waters. *Nat Sustain* 2020, 3,  
553 303–311, doi:10.1038/s41893-020-0478-9.
- 554 12. Sohn, H.Y.; Murray, D.B.; Kuriyama, H. Ultradian Oscillation of  
555 *Saccharomyces Cerevisiae* during Aerobic Continuous Culture: Hydrogen  
556 Sulphide Mediates Population Synchrony. *Yeast* 2000, 16, 1185–1190,  
557 doi:10.1002/1097-0061(20000930)16:13<1185::AID-YEA619>3.0.CO;2-W.
- 558 13. Mendoza-Cózatl, D.; Loza-Tavera, H.; Hernández-Navarro, A.; Moreno-  
559 Sánchez, R. Sulfur Assimilation and Glutathione Metabolism under Cadmium  
560 Stress in Yeast, Protists and Plants. *FEMS Microbiol Rev* 2005, 29, 653–671,  
561 doi:10.1016/j.femsre.2004.09.004.
- 562 14. Oka, K.; Hayashi, T.; Matsumoto, N.; Yanase, H. Decrease in Hydrogen  
563 Sulfide Content during the Final Stage of Beer Fermentation Due to Involvement  
564 of Yeast and Not Carbon Dioxide Gas Purging. *J Biosci Bioeng* 2008, 106, 253–  
565 257, doi:10.1263/jbb.106.253.
- 566 15. Huang, C.-W.; Walker, M.E.; Fedrizzi, B.; Roncoroni, M.; Gardner, R.C.;  
567 Jiranek, V. The Yeast TUM1 Affects Production of Hydrogen Sulfide from  
568 Cysteine Treatment during Fermentation. *FEMS Yeast Res* 2016, 16, fow100,  
569 doi:10.1093/femsyr/fow100.
- 570 16. D'Andrea, R.; Surdin-Kerjan, Y.; Pure, G.; Cherest, H. Molecular Genetics  
571 of Met 17 and Met 25 Mutants of *Saccharomyces Cerevisiae*: Intragenic  
572 Complementation between Mutations of a Single Structural Gene. *Mol Gen*  
573 *Genet* 1987, 207, 165–170, doi:10.1007/BF00331505.
- 574 17. Mustafa, A.K.; Gadalla, M.M.; Sen, N.; Kim, S.; Mu, W.; Gazi, S.K.; Barrow,  
575 R.K.; Yang, G.; Wang, R.; Snyder, S.H. H<sub>2</sub>S Signals through Protein S-  
576 Sulfhydration. *Sci Signal* 2009, 2, ra72, doi:10.1126/scisignal.2000464.

- 577 18. Krishnan, N.; Fu, C.; Pappin, D.J.; Tonks, N.K. H<sub>2</sub>S-Induced Sulfhydration  
578 of the Phosphatase PTP1B and Its Role in the Endoplasmic Reticulum Stress  
579 Response. *Sci Signal* 2011, 4, ra86, doi:10.1126/scisignal.2002329.
- 580 19. Estrada-Ávila, A.K.; González-Hernández, J.C.; Calahorra, M.; Sánchez,  
581 N.S.; Peña, A. Xylose and Yeasts: A Story beyond Xylitol Production. *Biochim*  
582 *Biophys Acta Gen Subj* 2022, 1866, 130154, doi:10.1016/j.bbagen.2022.130154.
- 583 20. Bergkessel, M.; Guthrie, C.; Abelson, J. Yeast-Gene Replacement Using  
584 PCR Products. *Methods Enzymol* 2013, 533, 43–55, doi:10.1016/B978-0-12-  
585 420067-8.00005-2.
- 586 21. Paul, B.D.; Snyder, S.H. Protein Sulfhydration. *Methods Enzymol* 2015,  
587 555, 79–90, doi:10.1016/bs.mie.2014.11.021.
- 588 22. Cost, G.J.; Boeke, J.D. A Useful Colony Colour Phenotype Associated with  
589 the Yeast Selectable/Counter-Selectable Marker MET15. *Yeast* 1996, 12, 939–  
590 941, doi:10.1002/(SICI)1097-0061(199608)12:10%3C939::AID-  
591 YEA988%3E3.0.CO;2-L.
- 592 23. Choi, K.-M.; Kim, S.; Kim, S.; Lee, H.M.; Kaya, A.; Chun, B.-H.; Lee, Y.K.;  
593 Park, T.-S.; Lee, C.-K.; Eyun, S.-I.; et al. Sulfate Assimilation Regulates Hydrogen  
594 Sulfide Production Independent of Lifespan and Reactive Oxygen Species under  
595 Methionine Restriction Condition in Yeast. *Aging (Albany NY)* 2019, 11, 4254–  
596 4273, doi:10.18632/aging.102050.
- 597 24. Peña, A.; Sánchez, N.S.; González-López, O.; Calahorra, M. Mechanisms  
598 Involved in the Inhibition of Glycolysis by Cyanide and Antimycin A in *Candida*  
599 *Albicans* and Its Reversal by Hydrogen Peroxide. A Common Feature in *Candida*  
600 Species. *FEMS Yeast Res* 2015, 15, fov083, doi:10.1093/femsyr/fov083.



- 601 25. Sakai, H.; Suzuki, K.; Imahori, K. Purification and Properties of Pyruvate  
602 Kinase from *Bacillus Stearothermophilus*. *J Biochem* 1986, 99, 1157–1167,  
603 doi:10.1093/oxfordjournals.jbchem.a135579.
- 604 26. Bergmeyer, H.V.; Gawhn, K.; Grassel, M. Alcohol Dehydrogenase. In  
605 *Methods of Enzymatic Analysis*; Academic Press: New York, 1974; Vol. 1, pp.  
606 428–429.
- 607 27. Marino, S.M.; Li, Y.; Fomenko, D.E.; Agisheva, N.; Cerny, R.L.; Gladyshev,  
608 V.N. Characterization of Surface-Exposed Reactive Cysteine Residues in  
609 *Saccharomyces Cerevisiae*. *Biochemistry* 2010, 49, 7709–7721,  
610 doi:10.1021/bi100677a.
- 611 28. Alcock, L.J.; Perkins, M.V.; Chalker, J.M. Chemical Methods for Mapping  
612 Cysteine Oxidation. *Chem Soc Rev* 2018, 47, 231–268,  
613 doi:10.1039/c7cs00607a.
- 614 29. Fu, L.; Liu, K.; He, J.; Tian, C.; Yu, X.; Yang, J. Direct Proteomic Mapping  
615 of Cysteine Persulfidation. *Antioxid Redox Signal* 2020, 33, 1061–1076,  
616 doi:10.1089/ars.2019.7777.
- 617 30. Dashko, S.; Zhou, N.; Compagno, C.; Piškur, J. Why, When, and How Did  
618 Yeast Evolve Alcoholic Fermentation? *FEMS Yeast Res* 2014, 14, 826–832,  
619 doi:10.1111/1567-1364.12161.
- 620 31. Marcet-Houben, M.; Gabaldón, T. Beyond the Whole-Genome  
621 Duplication: Phylogenetic Evidence for an Ancient In-ter-species Hybridization in  
622 the Baker's Yeast Lineage. *PLoS Biol* 2015, 13, e1002220,  
623 doi:10.1371/journal.pbio.1002220.
- 624 32. Shen, X.-X.; Opulente, D.A.; Kominek, J.; Zhou, X.; Steenwyk, J.L.; Buh,  
625 K.V.; Haase, M.A.B.; Wisecaver, J.H.; Wang, M.; Doering, D.T.; et al. Tempo and

626 Mode of Genome Evolution in the Budding Yeast Subphylum. *Cell* 2018, 175,  
627 1533-1545.e20, doi:10.1016/j.cell.2018.10.023.

628 33. Fabricio, M.F.; Valente, P.; Záchia Ayub, M.A. Oleaginous Yeast  
629 *Meyerozyma Guilliermondii* Shows Fermentative Metabolism of Sugars in the  
630 Biosynthesis of Ethanol and Converts Raw Glycerol and Cheese Whey Permeate  
631 into Polyunsaturated Fatty Acids. *Biotechnol Prog* 2019, 35, e2895,  
632 doi:10.1002/btpr.2895.

633 34. Gao, X.-H.; Krokowski, D.; Guan, B.-J.; Bederman, I.; Majumder, M.;  
634 Parisien, M.; Diatchenko, L.; Kabil, O.; Willard, B.; Banerjee, R.; et al. Quantitative  
635 H<sub>2</sub>S-Mediated Protein Sulfhydration Reveals Metabolic Reprogramming during  
636 the Integrated Stress Response. *Elife* 2015, 4, e10067, doi:10.7554/eLife.10067.

637 35. Aroca, Á.; Serna, A.; Gotor, C.; Romero, L.C. S-Sulfhydration: A Cysteine  
638 Posttranslational Modification in Plant Systems. *Plant Physiol* 2015, 168, 334–  
639 342, doi:10.1104/pp.15.00009.

640 36. Aroca, A.; Benito, J.M.; Gotor, C.; Romero, L.C. Persulfidation Proteome  
641 Reveals the Regulation of Protein Function by Hydrogen Sulfide in Diverse  
642 Biological Processes in *Arabidopsis*. *J Exp Bot* 2017, 68, 4915–4927,  
643 doi:10.1093/jxb/erx294.

644 37. Peng, H.; Zhang, Y.; Palmer, L.D.; Kehl-Fie, T.E.; Skaar, E.P.; Trinidad,  
645 J.C.; Giedroc, D.P. Hydrogen Sulfide and Reactive Sulfur Species Impact  
646 Proteome S-Sulfhydration and Global Virulence Regulation in *Staphylococcus*  
647 *Aureus*. *ACS Infect Dis* 2017, 3, 744–755, doi:10.1021/acsinfecdis.7b00090.

648 38. Aroca, A.; Schneider, M.; Scheibe, R.; Gotor, C.; Romero, L.C. Hydrogen  
649 Sulfide Regulates the Cytosolic/Nuclear Partitioning of Glyceraldehyde-3-  
650 Phosphate Dehydrogenase by Enhancing Its Nuclear Localization. *Plant Cell*  
651 *Physiol* 2017, 58, 983–992, doi:10.1093/pcp/pcx056.

652 39. Mitchell, A.R.; Yuan, M.; Morgan, H.P.; McNae, I.W.; Blackburn, E.A.; Le  
653 Bihan, T.; Homem, R.A.; Yu, M.; Loake, G.J.; Michels, P.A.; et al. Redox  
654 Regulation of Pyruvate Kinase M2 by Cysteine Oxidation and S-Nitrosation.  
655 *Biochem J* 2018, 475, 3275–3291, doi:10.1042/BCJ20180556.

656 40. Ford, A.E.; Denicourt, C.; Morano, K.A. Thiol Stress-Dependent  
657 Aggregation of the Glycolytic Enzyme Triose Phosphate Isomerase in Yeast and  
658 Human Cells. *Mol Biol Cell* 2019, 30, 554–565, doi:10.1091/mbc.E18-10-0616.

659 41. Li, L.; Whiteman, M.; Guan, Y.Y.; Neo, K.L.; Cheng, Y.; Lee, S.W.; Zhao,  
660 Y.; Baskar, R.; Tan, C.-H.; Moore, P.K. Characterization of a Novel, Water-  
661 Soluble Hydrogen Sulfide-Releasing Molecule (GYY4137): New Insights into the  
662 Biology of Hydrogen Sulfide. *Circulation* 2008, 117, 2351–2360,  
663 doi:10.1161/CIRCULATIONAHA.107.753467.

664 42. Ju, Y.; Wu, L.; Yang, G. Thioredoxin 1 Regulation of Protein S-  
665 Desulfhydration. *Biochem Biophys Rep* 2016, 5, 27–34,  
666 doi:10.1016/j.bbrep.2015.11.012.

667 43. Wedmann, R.; Onderka, C.; Wei, S.; Szióártó, I.A.; Miljkovic, J.L.; Mitrovic,  
668 A.; Lange, M.; Savitsky, S.; Yadav, P.K.; Torregrossa, R.; et al. Improved Tag-  
669 Switch Method Reveals That Thioredoxin Acts as Depersulfidase and Controls  
670 the Intracellular Levels of Protein Persulfidation. *Chem Sci* 2016, 7, 3414–3426,  
671 doi:10.1039/c5sc04818d.

672 44. Paul, B.D.; Filipovic, M.R. Editorial: Molecular Mechanisms of Thiol-Based  
673 Redox Homeostasis and Signaling in the Brain. *Front Aging Neurosci* 2021, 13,  
674 771877, doi:10.3389/fnagi.2021.771877.

675 45. Campbell-Burk, S.L.; Shulman, R.G. High-Resolution NMR Studies of  
676 *Saccharomyces Cerevisiae*. *Annu Rev Microbiol* 1987, 41, 595–616,  
677 doi:10.1146/annurev.mi.41.100187.003115.

678 46. Harsch, M.J.; Lee, S.A.; Goddard, M.R.; Gardner, R.C. Optimized  
679 Fermentation of Grape Juice by Laboratory Strains of *Saccharomyces*  
680 *Cerevisiae*. *FEMS Yeast Res* 2010, 10, 72–82, doi:10.1111/j.1567-  
681 1364.2009.00580.x.

682 47. Wang, T.; Yang, Y.; Liu, M.; Liu, H.; Liu, H.; Xia, Y.; Xun, L. Elemental  
683 Sulfur Inhibits Yeast Growth via Producing Toxic Sulfide and Causing Disulfide  
684 Stress. *Antioxidants (Basel)* 2022, 11, 576, doi:10.3390/antiox11030576.

685 48. Módis, K.; Ju, Y.; Ahmad, A.; Untereiner, A.A.; Altaany, Z.; Wu, L.; Szabo,  
686 C.; Wang, R. S-Sulphydration of ATP Synthase by Hydrogen Sulfide Stimulates  
687 Mitochondrial Bioenergetics. *Pharmacol Res* 2016, 113, 116–124,  
688 doi:10.1016/j.phrs.2016.08.023.

689

690

691

692

693

694

695

696

697

698 **Figure 1.** H<sub>2</sub>S productivity correlates with S-persulfidated proteins levels. (A) H<sub>2</sub>S  
699 productivity by *wt*, *met5Δmet10Δ* and *met17Δ*. Cells were incubated at 30°C on  
700 YPDL plates for 4 days. (B) S-persulfidated proteins in *wt*, *met5Δmet10Δ* and  
701 *met17Δ* strains. Whole cell extracts from exponential phase cultures were  
702 subjected to the modified biotin switch assay with antibody against biotin (α-Biotin  
703 Ab) to detect S-persulfidation.

704 **Figure 2.** Confirmation of S-persulfidated proteins by streptavidin beads  
705 precipitation. A. Whole cell extracts from exponential phase cultures were subject  
706 to the modified biotin switch assay, precipitated with streptavidin beads and  
707 detected with antibodies specific to each protein; enolase (Eno2), glyceraldehyde  
708 3 phosphate dehydrogenase (Tdh3), cystathionine beta synthase (Cys4) and  
709 triose phosphate isomerase (Tpi1). HPDP-B: (N-[6-(biotinamido)hexyl]-3'-(2'-  
710 pyridyldithio)propionamide). B. Whole cell extract from exponential phase  
711 cultures after modified biotin switch assay was used as input control. (-) line  
712 shows the proteins that reacts with anti-biotin antibody. (+) line shows biotinylated  
713 proteins after modified biotin switch assay. TCL: Total cell lysate, PP STREP:  
714 Streptavidin precipitation.

715 **Figure 3.** H<sub>2</sub>S production reach a maximal during log phase. Yeast cell were  
716 cultured in 96 wells microplate at 30°C and growth was measured at 600 nm. H<sub>2</sub>S  
717 was detected measuring methylene blue reduction at 663 nm.

718 **Figure 4.** H<sub>2</sub>S increase the activity of GAPDH and Pyruvate Kinase two hours  
719 after stimu-lation. (A) Yeast cell cultures at exponential phase were treated with  
720 NaHS 0.1 and 0.25 mM. Two hours later whole cell extracts were used to  
721 measure GAPDH activity in vitro at 37°C. One-way ANOVA \*\* P<0.0001. (B)  
722 Yeast cell cultures at exponential phase were treated with NaHS 0.1 and 0.25  
723 mM. Seven hours later whole cell extracts were used to measure GAPDH ac-  
724 tivity in vitro at 37°C. (C) Yeast cell cultures at exponential phase were treated  
725 with NaHS 0.1 and 0.25 mM. Two hours later whole cell extracts were used to  
726 measure Pyruvate Kinase activity in vitro at 37°C. (D) Yeast cell cultures at  
727 exponential phase were treated with NaHS 0.1 and 0.25 mM. Seven hours later

728 whole cell extracts were used to measure Pyruvate Kinase activity in vitro at  
729 37°C. One-way ANOVA \* P<0.01. Closed circles, untreated cells; closed squares,  
730 NaHS 0.1 mM; closed triangles, NaHS 0.25 .

731 **Figure 5.** Exogenous and endogenous H<sub>2</sub>S on yeast cells induce ethanol  
732 production and ATP synthesis. (A) BY4742 yeast cell cultures were treated with  
733 NaHS 0.1 mM and seven hour later supernatants were collected. Ethanol  
734 production was measured in vitro at 37°C. Closed circles, untreated cells; closed  
735 squares, NaHS 0.1 mM. Unpaired t \* P=0.04. (B) Yeast cell cultures of the strains  
736 BY4741 and BY4742 supernatants were collected at 24 h. Ethanol production  
737 was measured in vitro at 37°C. Closed squares, BY4741; open squares, BY4742.  
738 Unpaired t \* P=0.02 (C) Yeast cell cultures at exponential phase were treated  
739 with NaHS 0.1 and 0.25 mM. Two and four hours later whole cell extracts were  
740 lysated and ATP was quantified. ATP production was measure in vitro at 37°C.  
741 Closed circles, untreated cells; closed squares, NaHS 0.1 mM; closed triangles,  
742 NaHS 0.25 mM. One-way ANOVA \*\* P<0.001.

743 **Figure 6.** Yeast mutants that accumulate H<sub>2</sub>S synthesize ethanol faster and more  
744 ATP than lower endogenously accumulated H<sub>2</sub>S. (A) 48 hours precultures of  
745 yeast cell of the strains *wt*, *met5Δmet10Δ* and *met17Δ* were resuspended in fresh  
746 media and supernatants were collected every hour. Ethanol production was  
747 measured in vitro at 37°C. (B) Yeast cell cultures at exponential and stationary  
748 phase of the strains *wt*, *met5Δmet10Δ* and *met17Δ* were lysated and ATP was  
749 quantified. ATP production was measure in vitro at 37°C. One-way ANOVA \*  
750 P<0.05, \*\* P<0.01. Open circles, *wt*; closed squares, *met5Δmet10Δ*; closed  
751 diamonds, *met17Δ*.

752 **Figure 7.** Endogenous H<sub>2</sub>S promotes basal oxygen consumption. 48 hours  
753 precultures of the *wt* and the mutants was diluted to an OD<sub>600</sub>= 0.2, and oxygen  
754 consumption was measured. The basal oxygen consumption was measured in  
755 resting cells in a Clark electrode at 30°C. Seven hours after dilution oxygen  
756 consumption was measured again. One-way ANOVA \* P<0.05, \*\* P<0.01. Open  
757 circles, *wt*; closed squares, *met5Δmet10Δ*; closed diamonds, *met17Δ*.

758 **Figure 8.** Exogenous H<sub>2</sub>S induce ethanol production in *K. marxianus* and *M.*  
759 *guilliermondi*. (A) *K. marxianus* yeast cell cultures were treated with NaHS 0.1  
760 mM and seven hour later supernatants were collected. Ethanol production was  
761 measured in vitro at 37°C. Unpaired t \*\* P=0.002. (B) *M. guilliermondi* yeast cell  
762 cultures were treated with NaHS 0.1 mM and 24 h later cells were treated again  
763 with same concentration of NaHS. Seven hour later supernatants were collected.  
764 Ethanol production was measured in vitro at 37°C. Unpaired t \* P=0.04. Closed  
765 circles, untreated cells; closed squares, NaHS 0.1 mM

766



**A**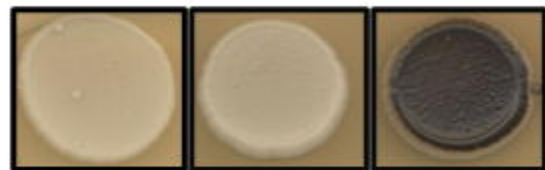*wt**Δmet5/10**Δmet17***B**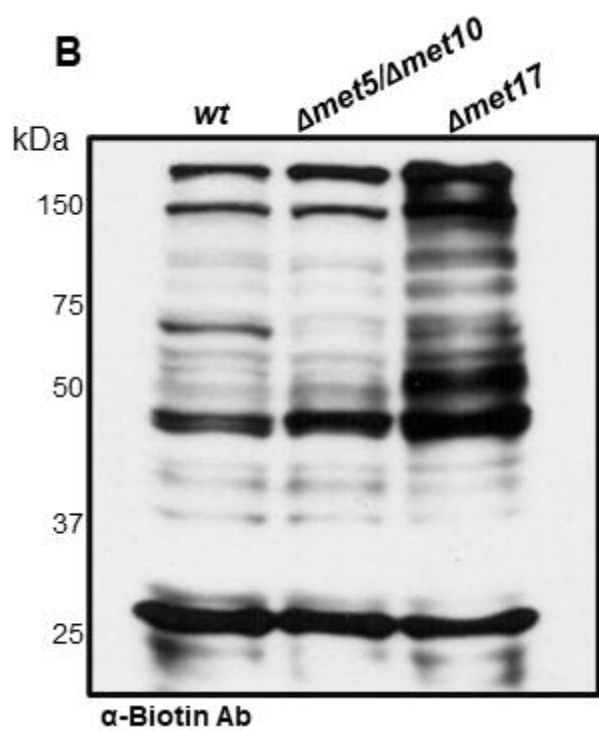

**A**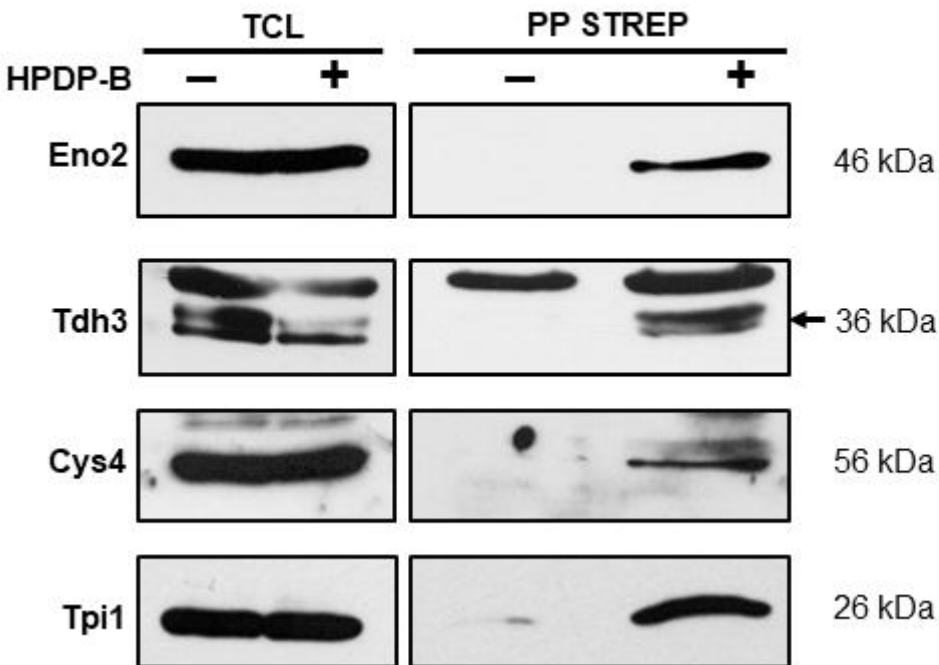**B**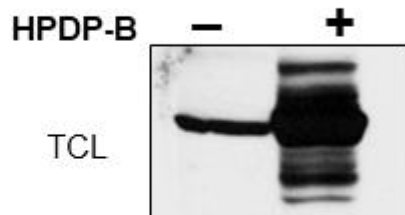

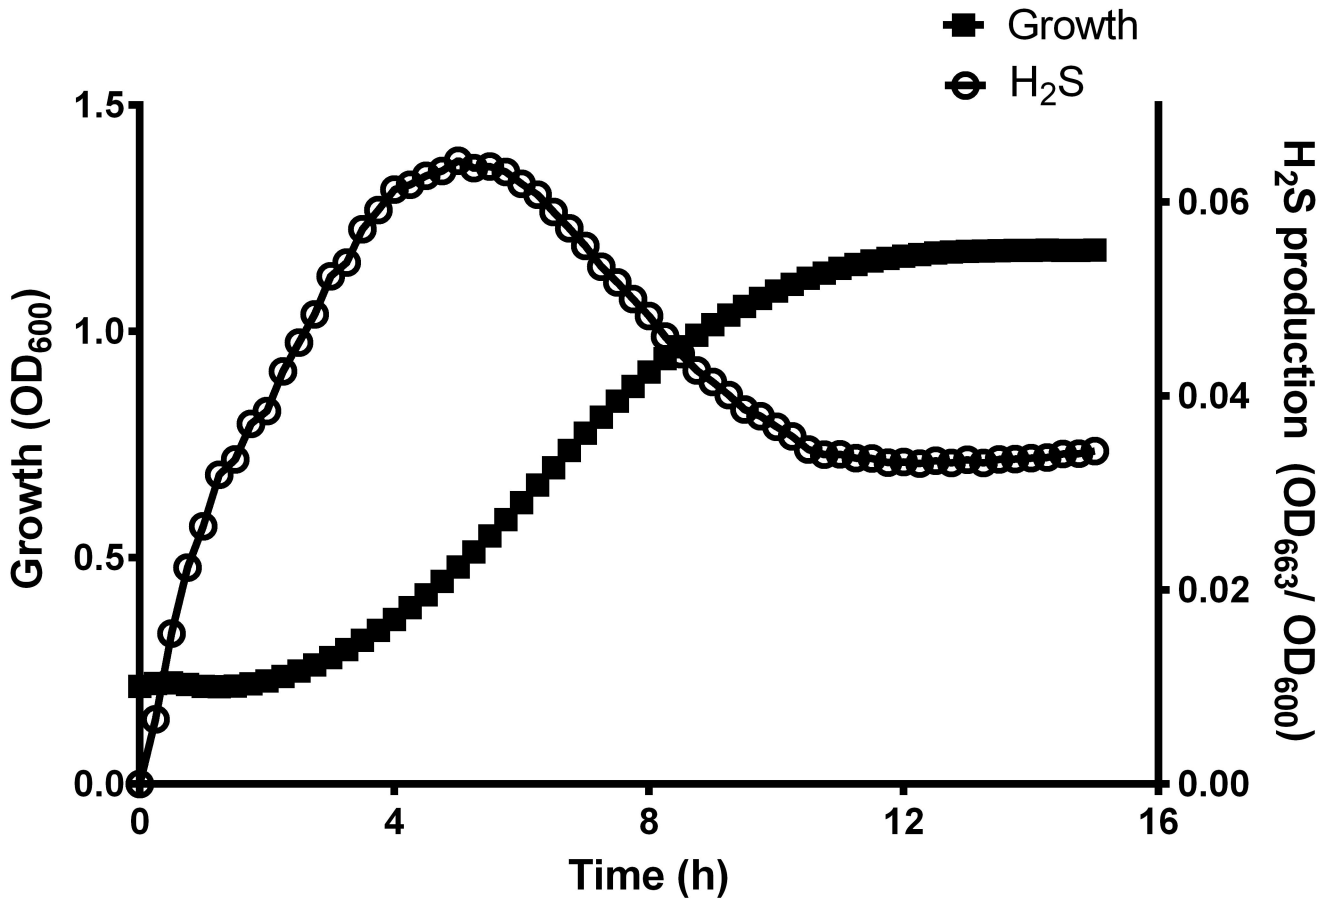

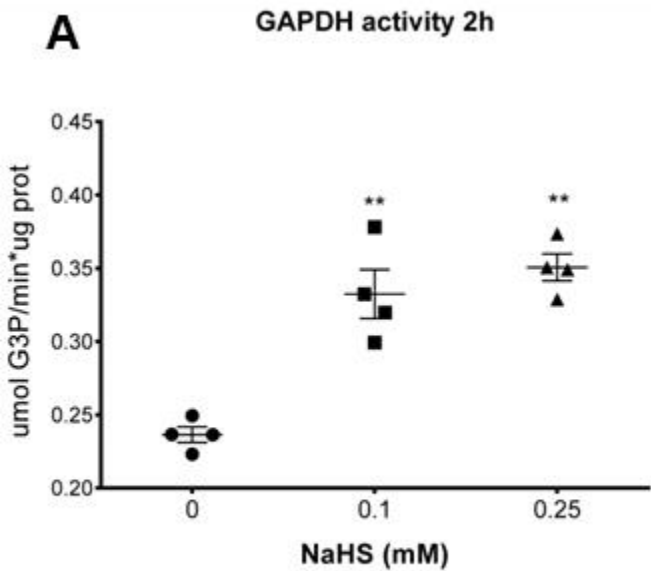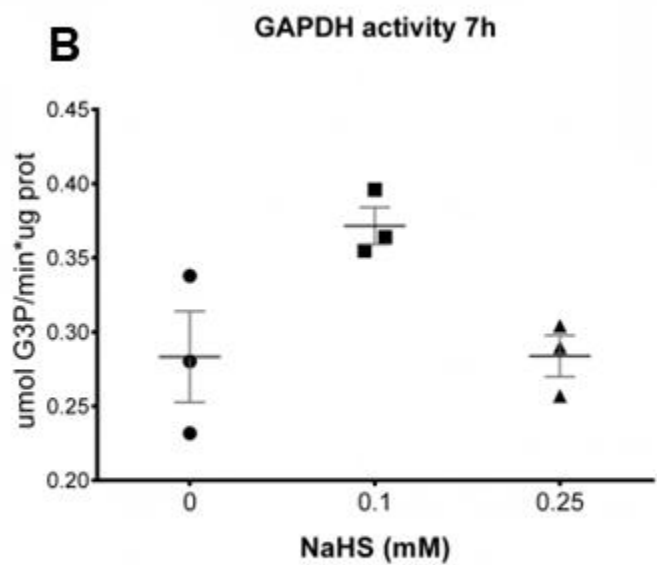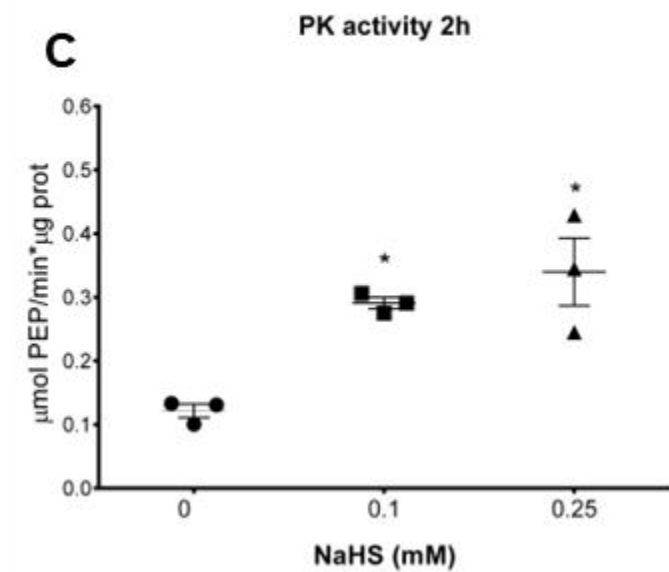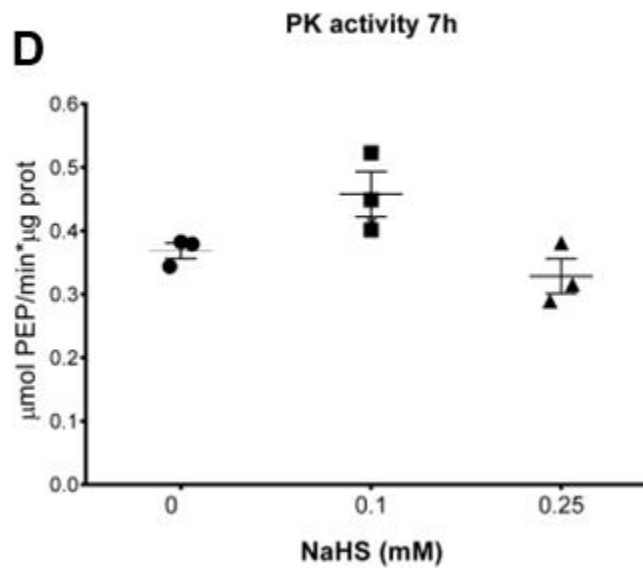

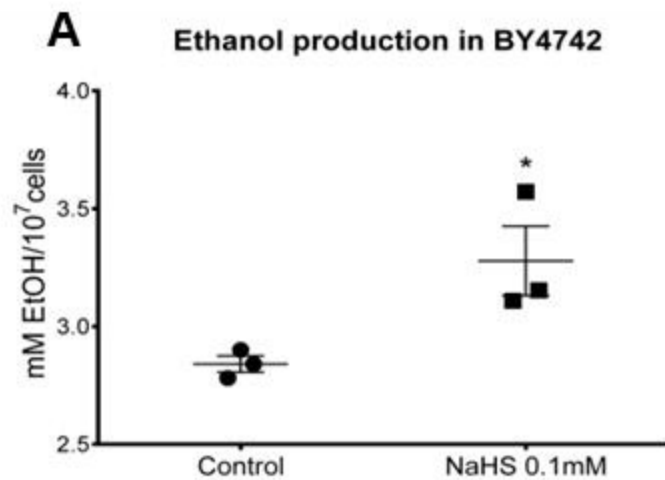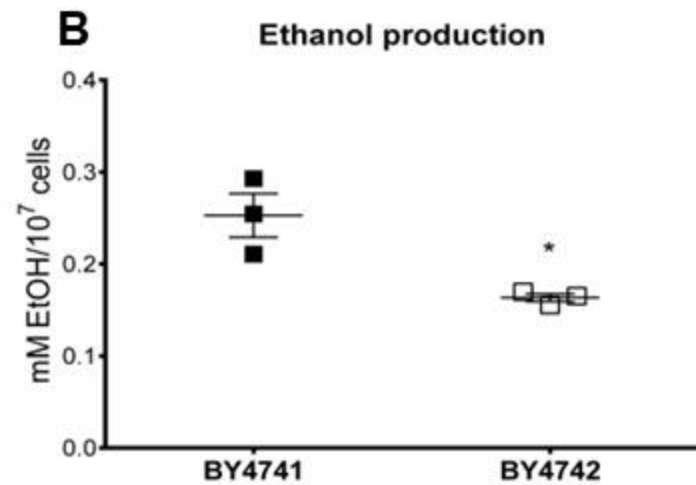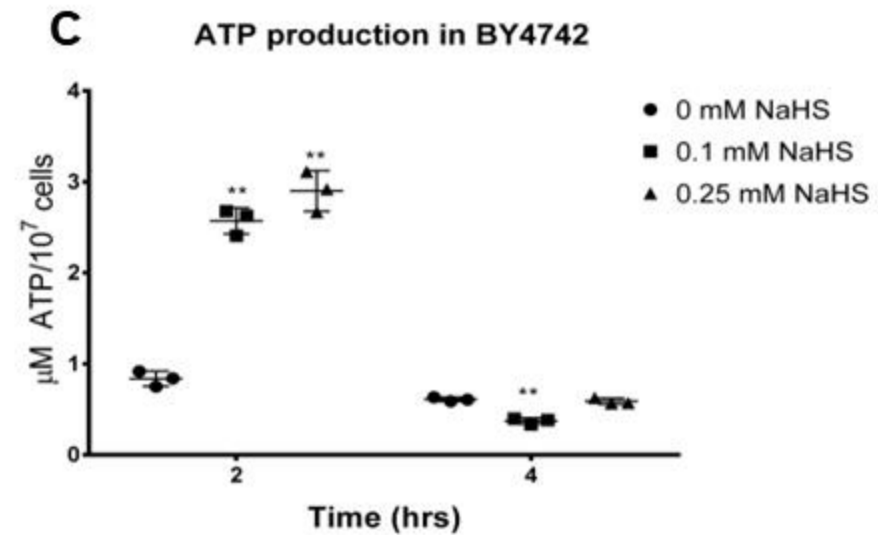

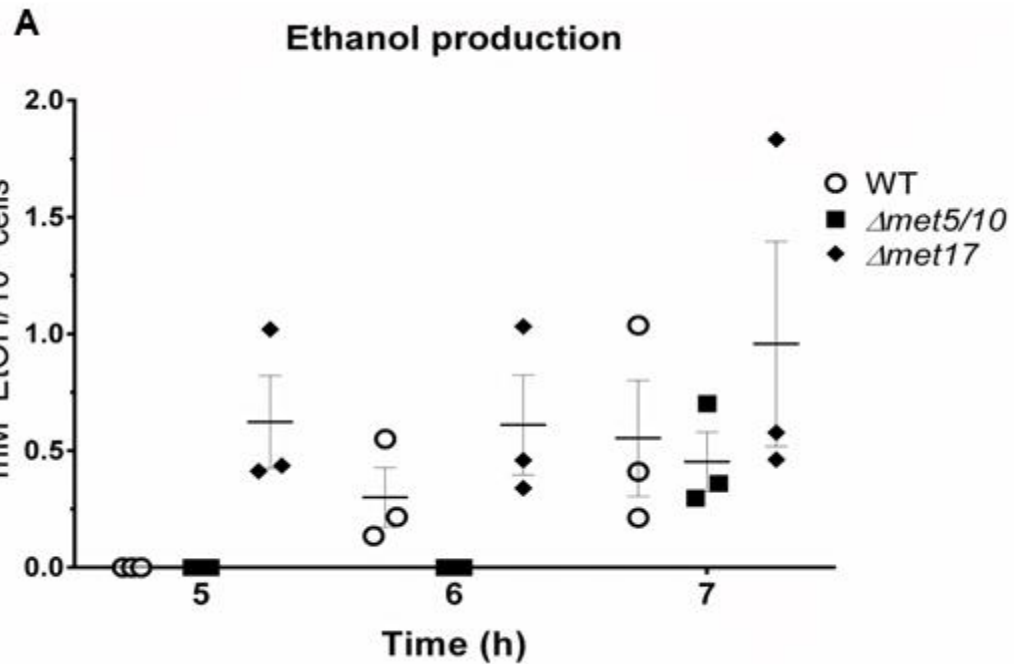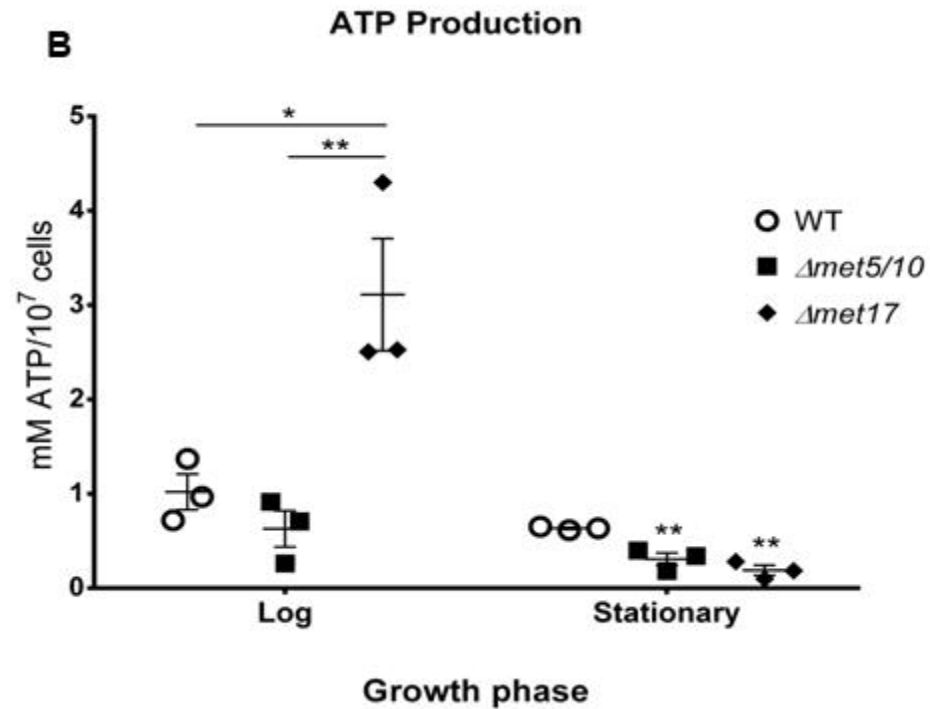

# Basal oxygen consumption rate

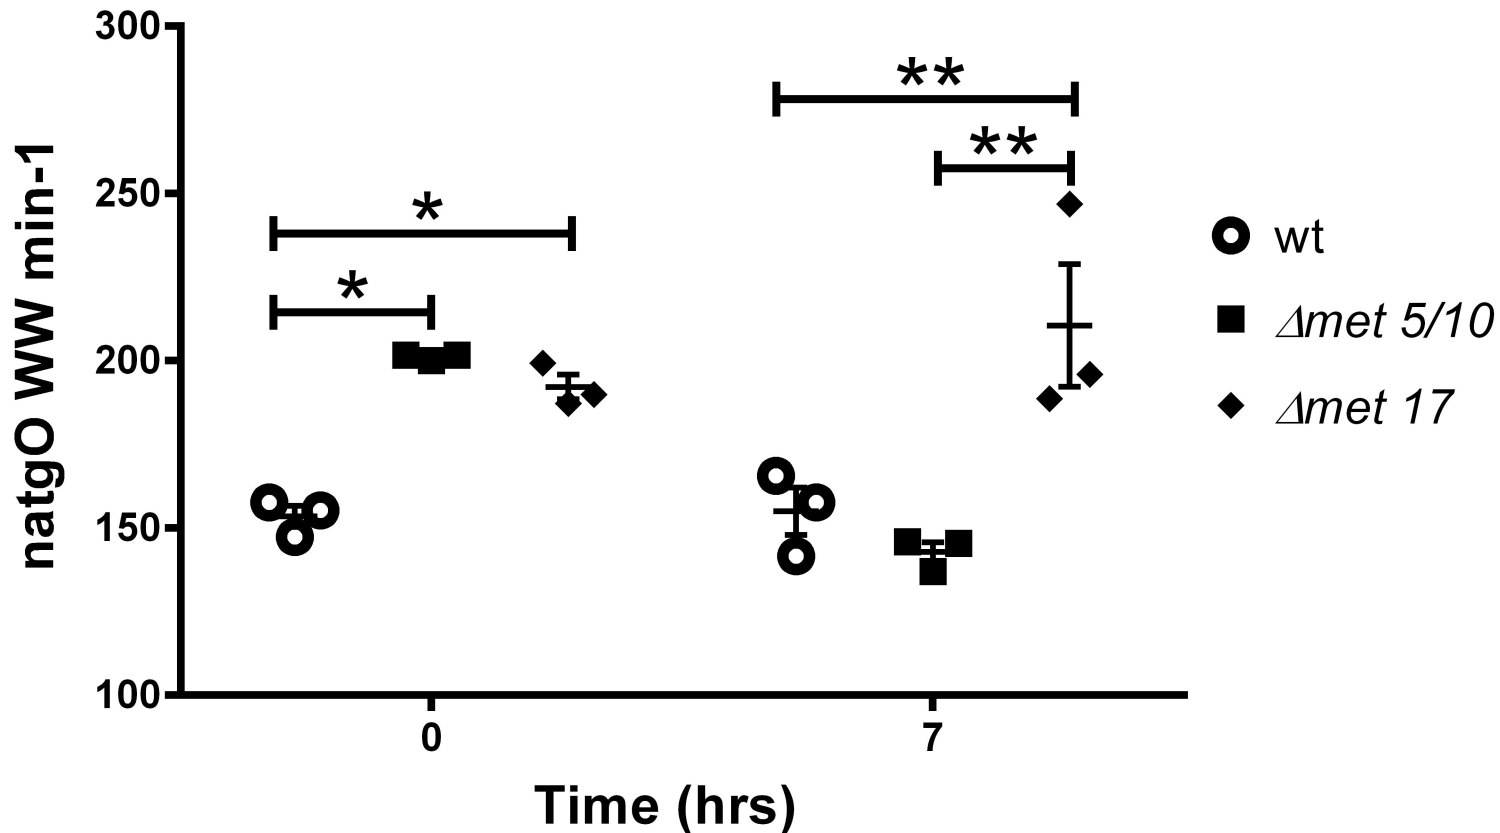

*K. marxianus*

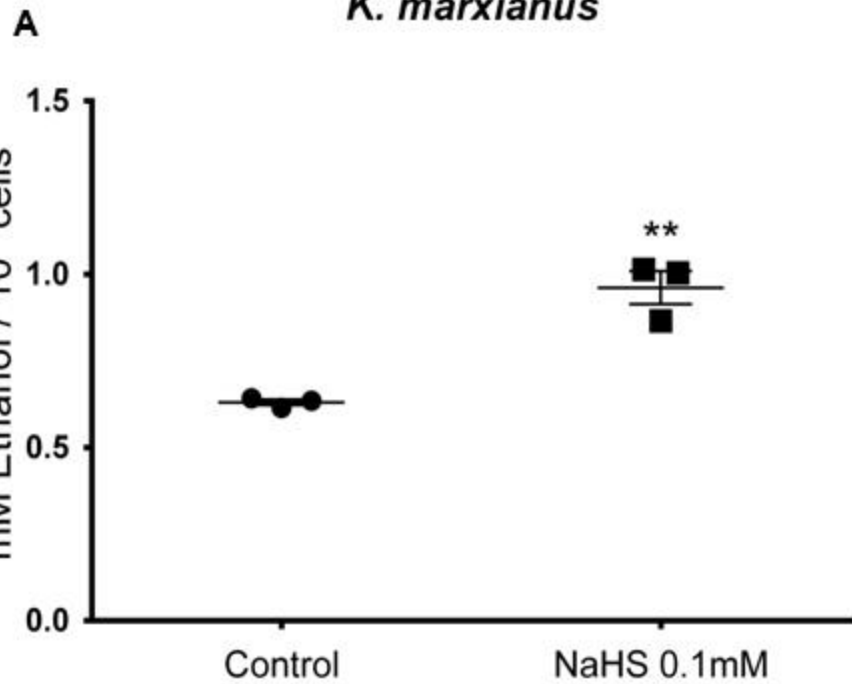

*M. guilliermondii*

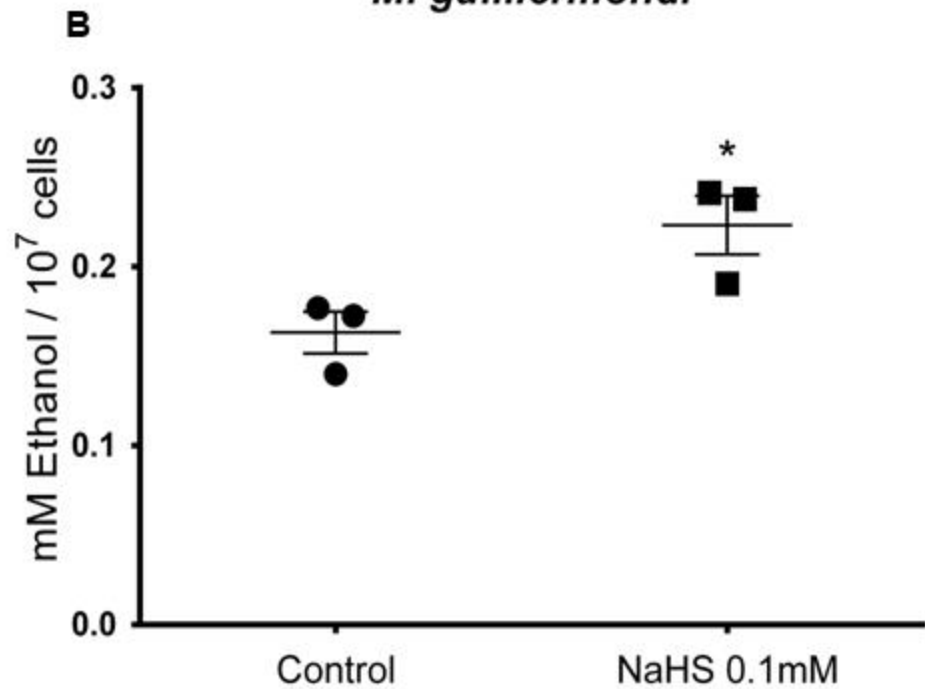

Source: https://www.biorxiv.org/content/10.1101/2022.08.09.503431v2.full.pdf
